# Supplementary material
Source: PubMed Central journal article supplement (PMC8660137)
Supplement: mmc1.pdf [file mmc1.pdf]

## SUPPLEMENTARY FIGURES

**Title:** The role of nanoparticle format and route of administration on self-amplifying mRNA vaccine potency

**Authors:** Giulia Anderluzzi<sup>1,2†</sup>, Gustavo Lou<sup>1,2†</sup>, Stuart Woods<sup>1</sup>, Signe Tandrup Schmidt<sup>1,4</sup>, Simona Gallorini<sup>2</sup>, Michela Brazzoli<sup>2</sup>, Russell Johnson<sup>3</sup>, Craig W. Roberts<sup>1</sup>, Derek T. O'Hagan<sup>3</sup>, Barbara C. Baudner<sup>2\*</sup> and Yvonne Perrie<sup>1\*</sup>

<sup>1</sup>Strathclyde Institute of Pharmacy and Biomedical Sciences, University of Strathclyde, 161 Cathedral St., G4 0RE Glasgow, Scotland.

<sup>2</sup>GSK, Siena, Italy.

<sup>3</sup>GSK, Rockville, MD 9911, USA.

<sup>4</sup>Department of Infectious Disease Immunology, Center for Vaccine Research, Statens Serum Institut, Artillerivej 5, 2300 Copenhagen S, Denmark.

†These authors contributed equally.

\*Corresponding authors

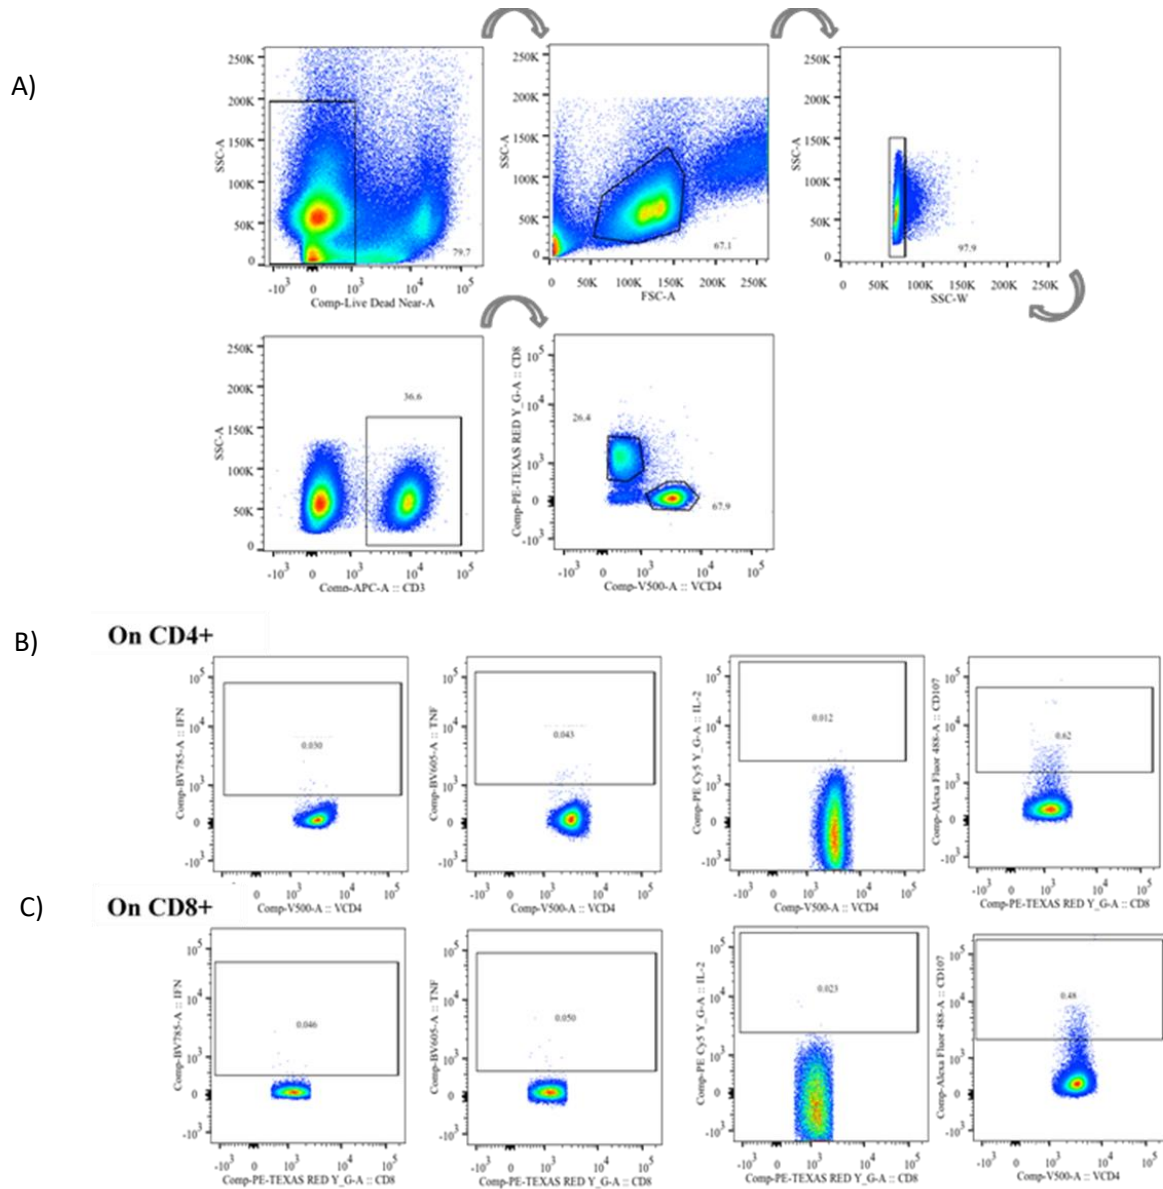

**Figure S1.** Gating strategy and representative dot plots for the identification of antigen-specific T cells upon re-stimulation in splenocytes. A) Gating on CD4+ and CD8+ T cells. B) CD4+ T cell cytokines. C) CD8+ T cell cytokines and CD107a. TNF- $\alpha$ +, IL2+ and IFN- $\gamma$ + cells were analyzed in combination with Boolean gates. CD107a+ cells were analyzed separately.

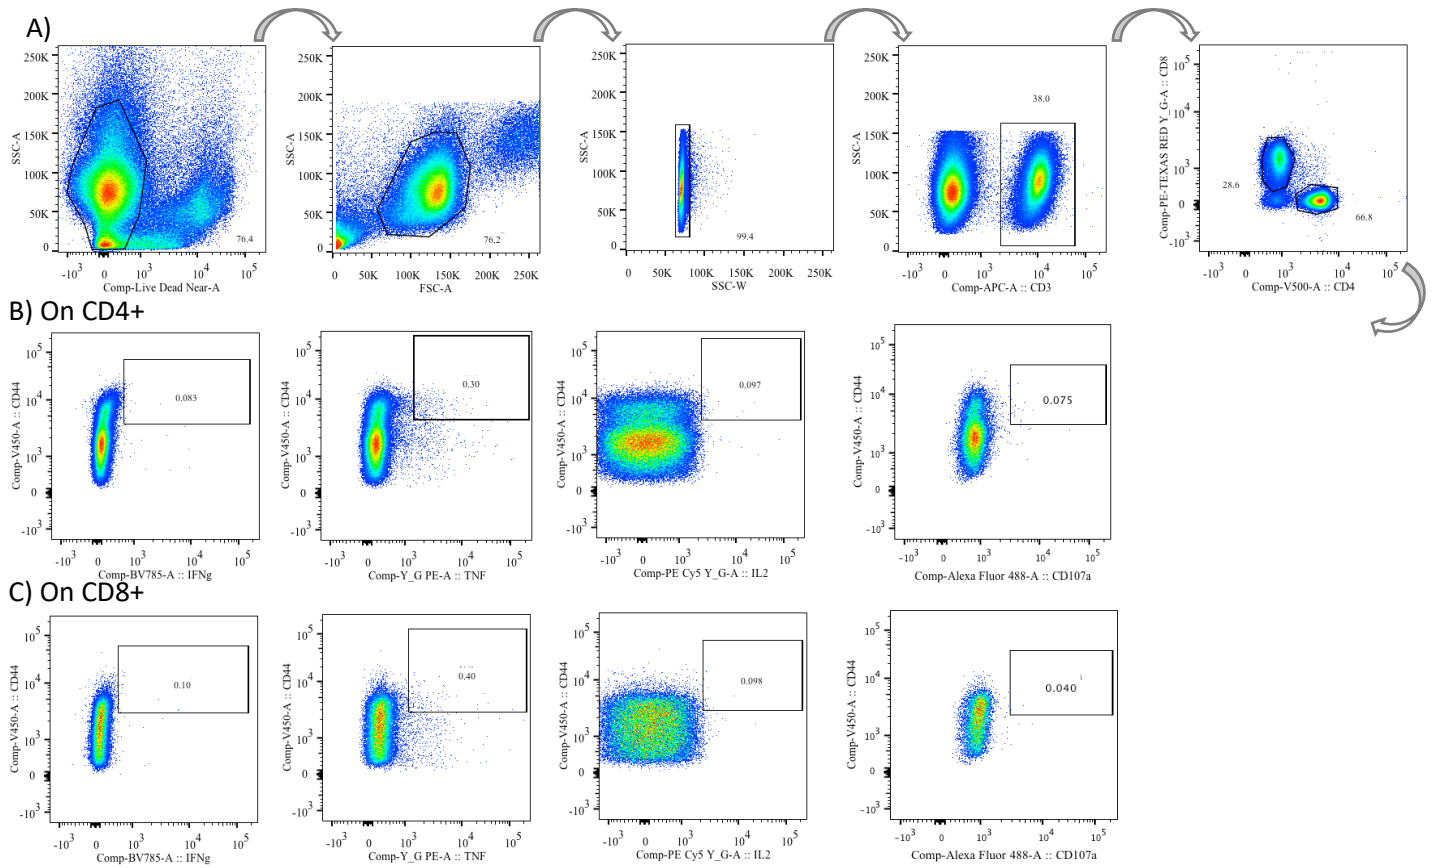

**Figure S2.** Gating strategy and representative dot plots used for the identification of antigen-specific T cells upon re-stimulation in lung cells. A) Gating on CD4+ and CD8+ T cells. B) CD44+ CD4+ T cell expressing cytokines. C) CD44+ CD8+ T cell expressing cytokines and CD107a. TNF- $\alpha$ +, IL-2+ and IFN- $\gamma$ + cells were analyzed in combination with Boolean gates. CD107a+ cells were analyzed separately.
